# Supplementary material for: Brief communication: Recent changes in summer Greenland blocking captured by none of the CMIP5 models
Source: Copernicus journal article supplement (doi:10.5194/tc-12-3287-2018), 2018-10-16
Supplement: Supplementary file 1 [file tc-12-3287-2018-supplement.pdf]

Supplement of The Cryosphere, 12, 3287–3292, 2018  
<https://doi.org/10.5194/tc-12-3287-2018-supplement>  
© Author(s) 2018. This work is distributed under  
the Creative Commons Attribution 4.0 License.

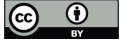

*Supplement of*

## **Brief communication: Recent changes in summer Greenland blocking captured by none of the CMIP5 models**

**Edward Hanna et al.**

*Correspondence to:* Edward Hanna (ehanna@lincoln.ac.uk)

The copyright of individual parts of the supplement might differ from the CC BY 4.0 License.

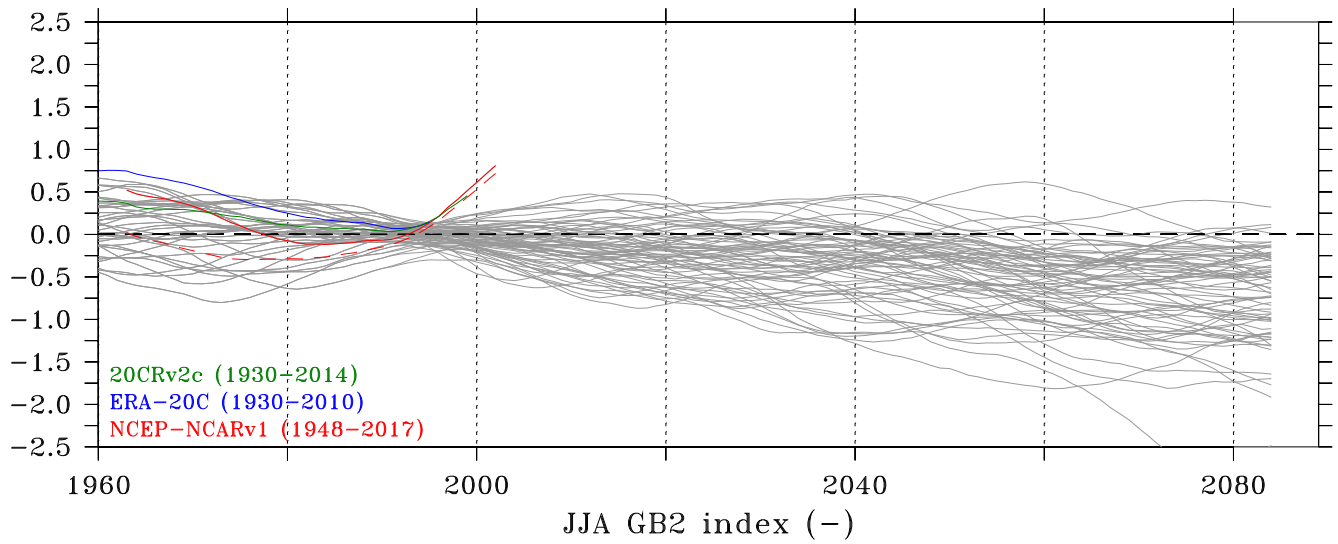

**Figure S1.** Same as Figure 1 but using a 30-year running mean.

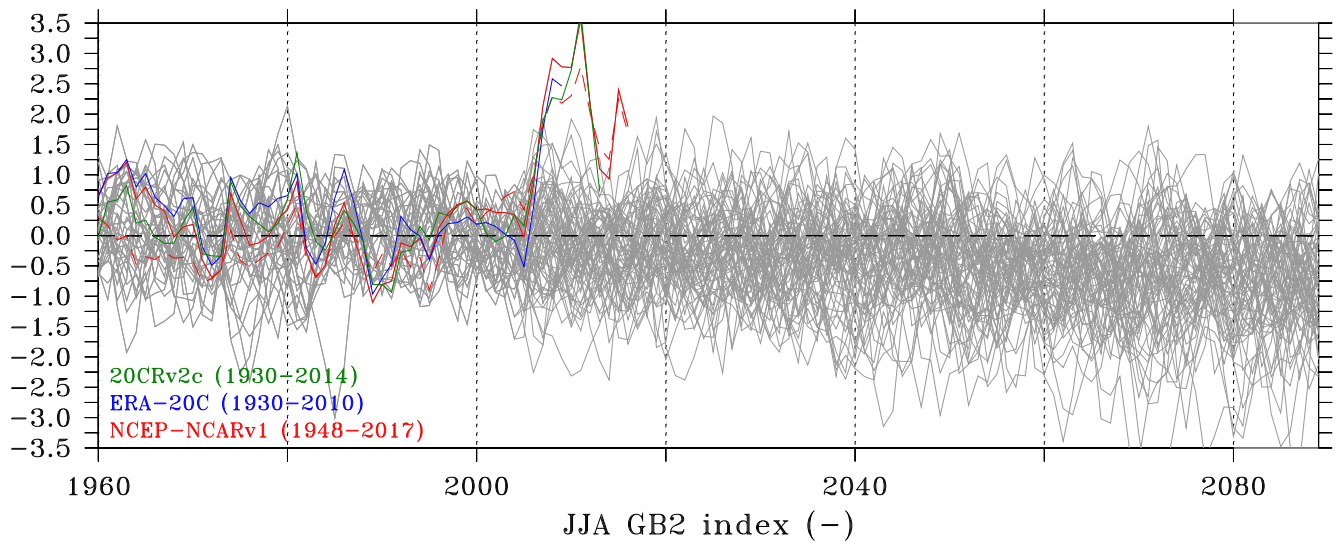

**Figure S2.** Same as Figure 1 but using a 3-year running mean.

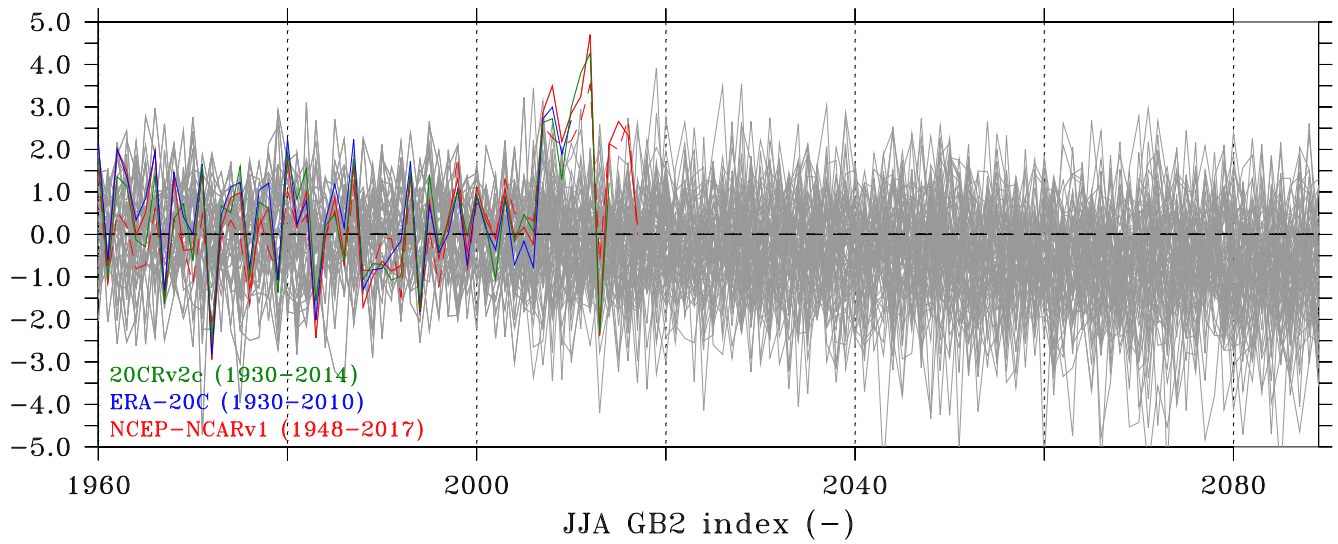

**Figure S3.** Same as Figure 1 but using unsmoothed data.

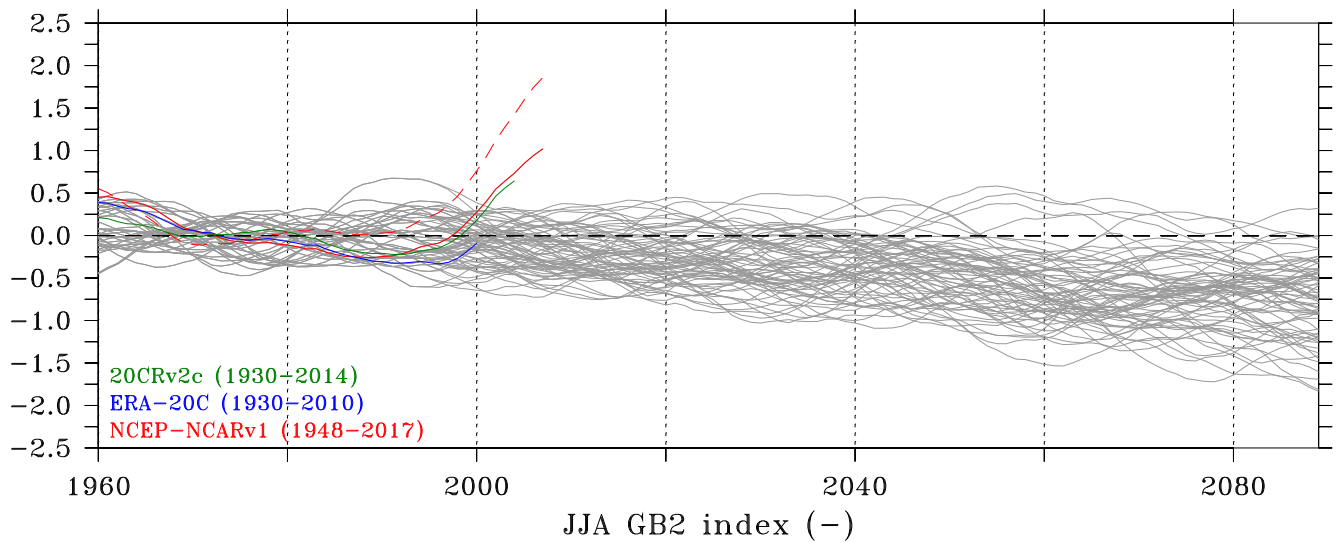

**Figure S4.** Same as Figure 1 in paper but using 1960–1990 as the reference period.

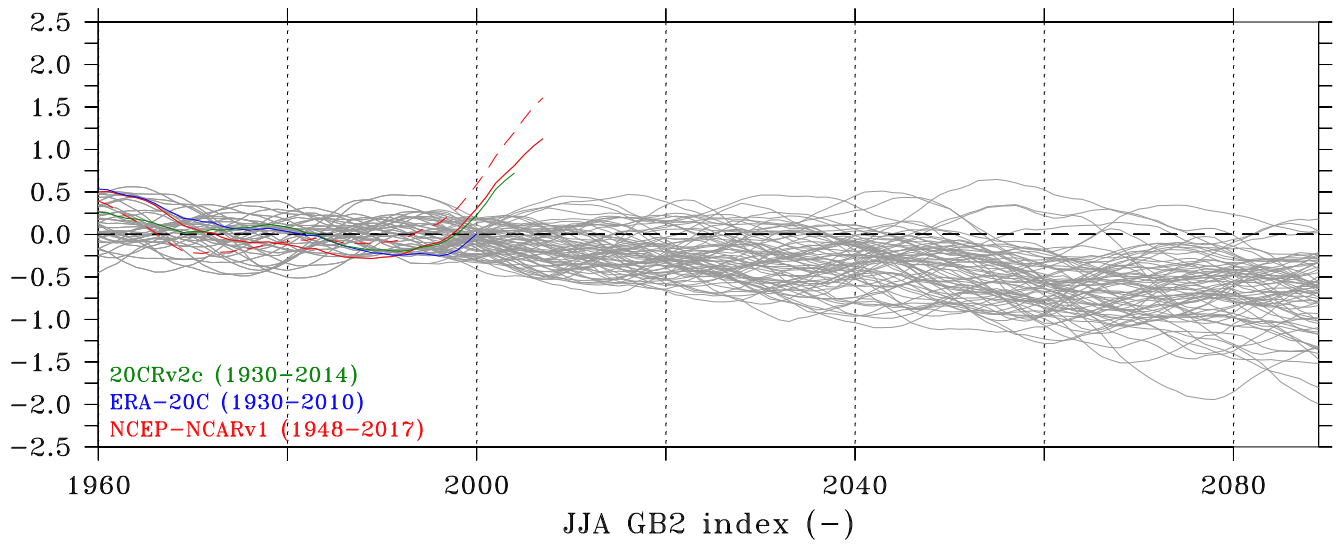

**Figure S5.** Same as Figure 1 in paper but using 1960–2005 as the reference period.

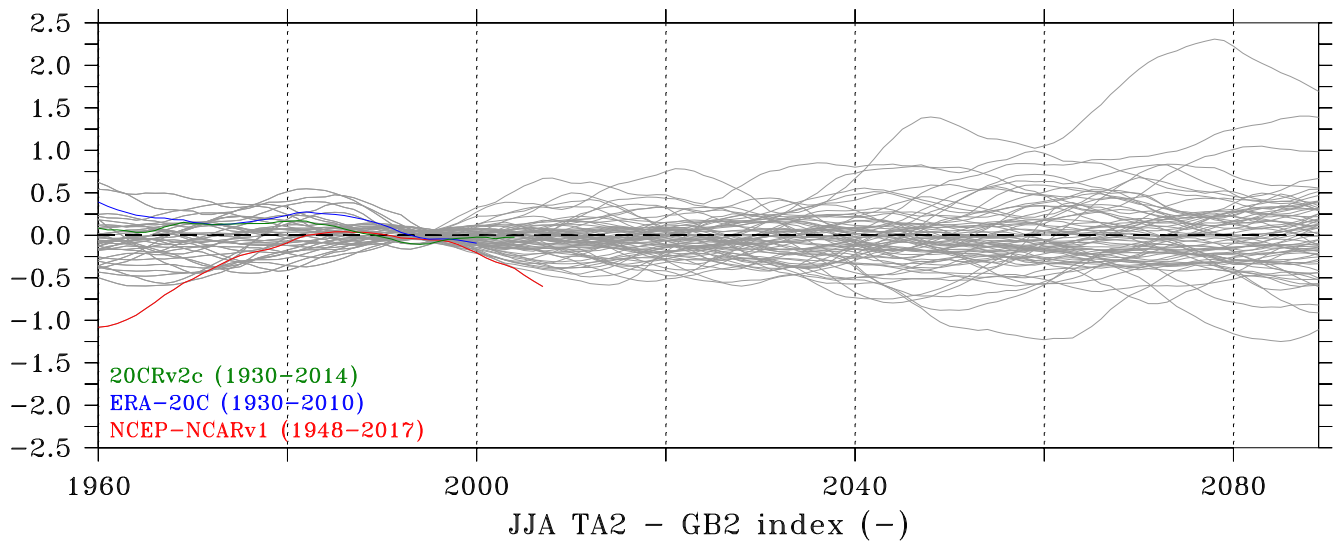

**Figure S6.** Time series of TA2 – GB2, which confirms that the post-2000 anomalies simulated by NCEP1 are out of range with respect to GCMs.

**Table S1.** List of the 36 CMIP5 global models (run r1i1p1) used in this study.

| Model name   | Model name     |
|--------------|----------------|
| ACCESS1-0    | GISS-E2-H      |
| ACCESS1-3    | GISS-E2-R-CC   |
| bcc-csm1-1-m | GISS-E2-R      |
| bcc-csm1-1   | HadGEM2-AO     |
| CanESM2      | HadGEM2-CC     |
| CCSM4        | HadGEM2-ES     |
| CESM1-BGC    | inmcm4         |
| CESM1-CAM5   | IPSL-CM5A-LR   |
| CMCC-CM      | IPSL-CM5A-MR   |
| CMCC-CMS     | IPSL-CM5B-LR   |
| CNRM-CM5     | MIROC5         |
| EC-EARTH     | MIROC-ESM-CHEM |
| FGOALS-g2    | MIROC-ESM      |
| FIO-ESM      | MPI-ESM-LR     |
| GFDL-CM3     | MPI-ESM-MR     |
| GFDL-ESM2G   | MRI-CGCM3      |
| GFDL-ESM2M   | NorESM1-ME     |
| GISS-E2-H-CC | NorESM1-M      |
